# Supplementary material for: Prevalence of Vitamin D Deficiency and Its Associated Work-Related Factors among Indoor Workers in a Multi-Ethnic Southeast Asian Country
Source: PubMed Central journal article supplement (PMC6981433; doi:10.3390/ijerph17010164), 2019-12-25
Supplement: ijerph-17-00164-s001.pdf [file ijerph-17-00164-s001.pdf]

**Table S1.** Characteristics of the study participants by job type.

|                                                              | Office Workers | Control Room Workers | Workshop Workers |
|--------------------------------------------------------------|----------------|----------------------|------------------|
| N                                                            | 109            | 54                   | 50               |
| <i>Socio-demographic characteristics</i>                     |                |                      |                  |
| Age (years)                                                  | 41.9 ± 11.0    | 44.7 ± 11.4          | 41.4 ± 10.4      |
| Gender                                                       |                |                      |                  |
| Male                                                         | 67 (61.5)      | 46 (85.2)            | 50 (100.0)       |
| Female                                                       | 42 (38.5)      | 8 (14.8)             | 0 (0.0)          |
| Ethnicity <sup>a</sup>                                       |                |                      |                  |
| Chinese                                                      | 89 (81.7)      | 42 (77.8)            | 20 (40.0)        |
| Non-Chinese                                                  | 20 (18.4)      | 12 (22.2)            | 30 (60.0)        |
| Marital status                                               |                |                      |                  |
| Single <sup>b</sup>                                          | 37 (33.9)      | 21 (38.9)            | 14 (28.0)        |
| Married                                                      | 72 (66.1)      | 33 (61.1)            | 36 (72.0)        |
| Education                                                    |                |                      |                  |
| Up to pre-college                                            | 53 (48.6)      | 39 (72.2)            | 43 (86.0)        |
| College and above                                            | 56 (51.4)      | 15 (27.8)            | 7 (14.0)         |
| Monthly income                                               |                |                      |                  |
| <\$4000                                                      | 62 (56.9)      | 30 (55.6)            | 49 (98.0)        |
| ≥\$4000                                                      | 47 (43.1)      | 24 (44.4)            | 1 (2.0)          |
| <i>Lifestyle habits</i>                                      |                |                      |                  |
| Smoking status                                               |                |                      |                  |
| Non/ex-smoker                                                | 100 (91.7)     | 43 (79.6)            | 33 (66.0)        |
| Current smoker                                               | 9 (8.3)        | 11 (20.4)            | 17 (34.0)        |
| Alcohol drinking                                             |                |                      |                  |
| Non-drinker                                                  | 55 (50.5)      | 24 (44.4)            | 30 (60.0)        |
| Drinker <sup>c</sup>                                         | 54 (49.5)      | 30 (55.6)            | 20 (40.0)        |
| Total minutes of leisure-time physical activity              | 90 (0–240)     | 85 (0–150)           | 60 (0–330)       |
| Intake of vitamin D rich foods (servings/day) <sup>d</sup>   | 0.7 (0.3–1.3)  | 0.7 (0.6–1.0)        | 0.9 (0.4–2.1)    |
| Regular use of vitamin D or calcium supplements <sup>e</sup> |                |                      |                  |
| No                                                           | 102 (93.6)     | 48 (88.9)            | 49 (98.0)        |
| Yes                                                          | 7 (6.4)        | 6 (11.1)             | 1 (2.0)          |
| <i>Clinical and biochemical characteristics</i>              |                |                      |                  |
| Body mass index (kg/m <sup>2</sup> )                         | 25.0 ± 5.1     | 26.3 ± 6.2           | 27.5 ± 5.3       |
| Systolic blood pressure (mmHg)                               | 119.3 ± 14.5   | 127.0 ± 17.1         | 126.1 ± 17.3     |
| Diastolic blood pressure (mmHg)                              | 70.5 ± 10.4    | 75.4 ± 12.2          | 76.2 ± 11.6      |
| Fasting plasma glucose (mmol/l)                              | 5.4 ± 1.5      | 5.6 ± 1.3            | 5.6 ± 1.3        |
| Total cholesterol (mmol/l)                                   | 5.3 ± 1.1      | 5.5 ± 1.1            | 5.4 ± 0.9        |
| <i>Work-related factors</i>                                  |                |                      |                  |
| Years employed in the current company                        | 5.1 (3.0–9.3)  | 10.4 (3.2–30.1)      | 3.9 (1.7–5.3)    |
| Work location                                                |                |                      |                  |
| Aboveground                                                  | 74 (67.9)      | 34 (63.0)            | 29 (58.0)        |
| Underground                                                  | 35 (32.1)      | 20 (37.0)            | 21 (42.0)        |
| Work hours/day                                               | 8.6 ± 0.9      | 9.3 ± 1.7            | 7.9 ± 1.2        |
| Night shifts per month                                       | 1 (1–1)        | 8 (1–9)              | 1 (1–1)          |

Data are mean ± standard deviation, median (inter-quartile range) or n (%). <sup>a</sup>Chinese includes a small number of mixed ethnicities (Filipino Chinese), and Filipinos. Non-Chinese includes Indians and Malays. <sup>b</sup>Includes never married, widowed, and divorced. <sup>c</sup>Includes those who drank alcohol less than once a month or at least once a month. <sup>d</sup>Includes milk and whole eggs. <sup>e</sup>Includes cod liver oil, fish oil, and other vitamin D containing supplements or calcium supplements.
